# Supplementary material for: Rapid Diagnostic Tests to Guide Case Management of and Improve Antibiotic Stewardship for Pediatric Acute Respiratory Illnesses in Resource-Constrained Settings: a Prospective Cohort Study in Southwestern Uganda
Source: PubMed Central journal article supplement (PMC8612158; doi:10.1128/spectrum.01694-21), 2021-11-24
Supplement: reviewer-comments.pdf [file reviewer-comments.pdf]

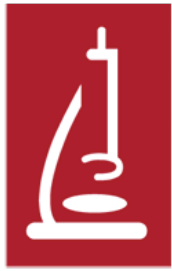

AMERICAN  
SOCIETY FOR  
MICROBIOLOGY

# Microbiology Spectrum

## Rapid diagnostic tests to guide case management of and improve antibiotic stewardship for pediatric acute respiratory illnesses in resource-constrained settings: a prospective cohort study in southwestern Uganda

Emily Ciccone, Lydia Kabugho, Emmanuel Baguma, Rabbison Muhindo, Jonathan Juliano, Edgar Mulogo, and Ross Boyce

*Corresponding Author(s): Emily Ciccone, University of North Carolina School of Medicine*

---

### Review Timeline:

Submission Date:

October 10, 2021

Accepted:

October 19, 2021

---

*Editor: Jennifer Dien Bard*

*Reviewer(s): The reviewers have opted to remain anonymous.*

### Transaction Report:

(Note: With the exception of the correction of typographical or spelling errors that could be a source of ambiguity, letters and reports are not edited. The original formatting of letters and referee reports may not be reflected in this compilation.)

**DOI:** <https://doi.org/10.1128/Spectrum.01694-21>

October 19, 2021

Dr. Emily J Ciccone  
University of North Carolina School of Medicine  
111 Mason Farm Road, MBRB 2341C, CB #7036  
CB #7036  
Chapel Hill, NC 27599-7036

Re: Spectrum01694-21 (Rapid diagnostic tests to guide case management of and improve antibiotic stewardship for pediatric acute respiratory illnesses in resource-constrained settings: a prospective cohort study in southwestern Uganda)

Dear Dr. Emily J Ciccone:

I am please to share that your manuscript has been accepted for publication in Microbiology Spectrum, and I am forwarding it to the ASM Journals Department for publication. You will be notified when your proofs are ready to be viewed.

The ASM Journals program strives for constant improvement in our submission and publication process. Please tell us how we can improve your experience by taking this quick [Author Survey](#).

As an open-access publication, Spectrum receives no financial support from paid subscriptions and depends on authors' prompt payment of publication fees as soon as their articles are accepted. You will be contacted separately about payment when the proofs are issued; please follow the instructions in that e-mail. Arrangements for payment must be made before your article is published. For a complete list of **Publication Fees**, including supplemental material costs, please visit our [website](#).

Corresponding authors may [join or renew ASM membership](#) to obtain discounts on publication fees. Need to upgrade your membership level? Please contact Customer Service at [Service@asmusa.org](mailto:Service@asmusa.org).

Thank you for submitting your paper to Spectrum.

Sincerely,

Jennifer Dien Bard  
Editor, Microbiology Spectrum

Journals Department  
American Society for Microbiology  
1752 N St., NW  
Washington, DC 20036  
E-mail: [spectrum@asmusa.org](mailto:spectrum@asmusa.org)
